# Supplementary material for: Diversity and structure of the microbial community in rhizosphere soil of Fritillaria ussuriensis at different health levels
Source: PeerJ. 2022 Jan 25;10:e12778. doi: 10.7717/peerj.12778 (PMC8796711; doi:10.7717/peerj.12778)
Supplement: Supplemental Information 1 — Different letters indicate a significant difference at P < 0.05 according to Duncan’s new multiple range test. OM, organic matter; TN, total nitrogen; AN, available nitrogen; TP, total phosphorus; AP, available phosphorus; TK, total potassium; AK, available potassium; salt, total soluble salt. [file peerj-10-12778-s001.xlsx]

## Sheet: Sheet1
SPECIMEN_NAME	TN（g/kg）	AN（mg/kg）	TP（g/kg）	AP（mg/kg）	AK（mg/kg）	TK（g/kg）	OM（g/kg）	pH	salt（g/kg）
H1	6.66	17.98	2.21	75.23	210.15	6.98	22.54	7.57	0.81
H2	5.12	17.75	1.91	75.65	190.95	6.77	23.24	7.45	0.86
H3	5.15	18.65	1.99	77.87	211.25	7.34	21.22	6.96	0.83
P1	7.25	22.25	3.35	100.54	225.27	7.75	20.28	5.15	1.15
P2	7.33	21.26	3.15	90.26	250.55	7.15	21.25	6.67	1.05
P3	7.35	20.26	2.54	95.75	215.65	7.24	22.25	6.89	1.05
B1	7.01	21.22	2.11	80.25	305.25	9.97	25.37	6.34	1.55
B2	6.15	19.95	1.56	81.15	310.15	7.98	26.46	6.61	1.35
B3	6.21	20.25	2.65	79.77	315.25	8.15	26.68	5.99	1.33
