# Supplementary material for: Diversity and structure of the microbial community in rhizosphere soil of Fritillaria ussuriensis at different health levels
Source: PeerJ. 2022 Jan 25;10:e12778. doi: 10.7717/peerj.12778 (PMC8796711; doi:10.7717/peerj.12778)
Supplement: Supplemental Information 2 — ∗ and∗∗ represent significance (P < 0.05 and P < 0.01) of soil samples according to Pearson’s correlation analysis. [file peerj-10-12778-s002.xlsx]

## Sheet: Sheet1
Fungi
Sample\Estimators	shannon	simpson	ace	chao	coverage
H2	4.40135	0.034605	873.672	881.085	0.998891
H1	4.5804	0.026864	742.529	744.205	0.998259
B2	4.13582	0.049399	744.575	748.516	0.99903
B3	4.40951	0.040557	875.263	881.692	0.998687
B1	4.27468	0.042974	799.939	815.447	0.997418
P1	4.10172	0.050515	708.241	715.631	0.998343
P3	3.99076	0.051233	722.982	717.319	0.997302
H3	4.48752	0.032412	774.219	781.616	0.997911
P2	4.11904	0.049947	820.544	822.71	0.996401
Bacteria
Sample\Estimators	shannon	simpson	ace	chao	coverage
B2	6.56339	0.003709	3014.79	2986.21	0.979497
H3	6.64065	0.003757	3127.24	3115.07	0.980548
P2	6.47514	0.003733	2947.98	2908.25	0.977041
P3	6.45207	0.003889	3014.65	2974.99	0.980218
H1	6.62766	0.003535	3035.03	3025.62	0.981987
P1	6.47198	0.003764	2868.86	2803.88	0.978634
B3	6.49941	0.004245	3021.36	2999.38	0.980511
H2	6.53122	0.004396	3010.14	2991.69	0.981403
B1	6.55437	0.003667	3051.6	2991.84	0.978179
Fungi
		pH	OM	TN	AN	TP	AP	TK	AK	salt	Shannon	Simpson	Ace	Chao
pH	Pearson	1	-0.012	-0.428	-.859**	-0.604	-0.63	-0.475	-0.446	-0.602	0.461	-0.611	0.181	0.147
	Significance (T)		0.976	0.25	0.003	0.085	0.069	0.197	0.229	0.086	0.212	0.081	0.641	0.706
	N	9	9	9	9	9	9	9	9	9	9	9	9	9
OM	Pearson	-0.012	1	-0.188	-0.067	-0.531	-0.495	0.541	.804**	.670*	0.124	0.004	0.409	0.419
	Significance (T)	0.976		0.629	0.863	0.141	0.176	0.132	0.009	0.048	0.751	0.991	0.274	0.261
	N	9	9	9	9	9	9	9	9	9	9	9	9	9
TN	Pearson	-0.428	-0.188	1	.744*	0.657	.717*	0.261	0.197	0.373	-0.635	0.627	-0.458	-0.467
	Significance (T)	0.25	0.629		0.021	0.055	0.03	0.497	0.612	0.323	0.066	0.071	0.215	0.205
	N	9	9	9	9	9	9	9	9	9	9	9	9	9
AN	Pearson	-.859**	-0.067	.744*	1	.671*	.768*	0.518	0.463	0.66	-.721*	.822**	-0.261	-0.238
	Significance (T)	0.003	0.863	0.021		0.048	0.016	0.153	0.209	0.053	0.028	0.007	0.498	0.537
	N	9	9	9	9	9	9	9	9	9	9	9	9	9
TP	Pearson	-0.604	-0.531	0.657	.671*	1	.756*	-0.103	-0.112	0.004	-0.396	0.444	-0.115	-0.127
	Significance (T)	0.085	0.141	0.055	0.048		0.018	0.792	0.774	0.992	0.291	0.232	0.767	0.745
	N	9	9	9	9	9	9	9	9	9	9	9	9	9
AP	Pearson	-0.63	-0.495	.717*	.768*	.756*	1	-0.042	-0.106	0.144	-.834**	.803**	-0.526	-0.54
	Significance (T)	0.069	0.176	0.03	0.016	0.018		0.915	0.786	0.711	0.005	0.009	0.145	0.134
	N	9	9	9	9	9	9	9	9	9	9	9	9	9
TK	Pearson	-0.475	0.541	0.261	0.518	-0.103	-0.042	1	.748*	.886**	-0.119	0.238	0.042	0.101
	Significance (T)	0.197	0.132	0.497	0.153	0.792	0.915		0.021	0.001	0.761	0.537	0.914	0.795
	N	9	9	9	9	9	9	9	9	9	9	9	9	9
AK	Pearson	-0.446	.804**	0.197	0.463	-0.112	-0.106	.748*	1	.899**	-0.17	0.364	0.214	0.238
	Significance (T)	0.229	0.009	0.612	0.209	0.774	0.786	0.021		0.001	0.662	0.335	0.581	0.537
	N	9	9	9	9	9	9	9	9	9	9	9	9	9
salt	Pearson	-0.602	.670*	0.373	0.66	0.004	0.144	.886**	.899**	1	-0.398	0.547	0.069	0.106
	Significance (T)	0.086	0.048	0.323	0.053	0.992	0.711	0.001	0.001		0.289	0.128	0.861	0.786
	N	9	9	9	9	9	9	9	9	9	9	9	9	9
Shannon	Pearson	0.461	0.124	-0.635	-.721*	-0.396	-.834**	-0.119	-0.17	-0.398	1	-.968**	0.39	0.406
	Significance (T)	0.212	0.751	0.066	0.028	0.291	0.005	0.761	0.662	0.289		0	0.3	0.278
	N	9	9	9	9	9	9	9	9	9	9	9	9	9
Simpson	Pearson	-0.611	0.004	0.627	.822**	0.444	.803**	0.238	0.364	0.547	-.968**	1	-0.282	-0.292
	Significance (T)	0.081	0.991	0.071	0.007	0.232	0.009	0.537	0.335	0.128	0		0.461	0.446
	N	9	9	9	9	9	9	9	9	9	9	9	9	9
Ace	Pearson	0.181	0.409	-0.458	-0.261	-0.115	-0.526	0.042	0.214	0.069	0.39	-0.282	1	.997**
	Significance (T)	0.641	0.274	0.215	0.498	0.767	0.145	0.914	0.581	0.861	0.3	0.461		0
	N	9	9	9	9	9	9	9	9	9	9	9	9	9
Chao	Pearson	0.147	0.419	-0.467	-0.238	-0.127	-0.54	0.101	0.238	0.106	0.406	-0.292	.997**	1
	Significance (T)	0.706	0.261	0.205	0.537	0.745	0.134	0.795	0.537	0.786	0.278	0.446	0
	N	9	9	9	9	9	9	9	9	9	9	9	9	9
T means two-sided test.
**. Significantly correlated at the .01 level (T).
*. Significantly correlated at the 0.05 level (T).
Bacteria
		pH	OM	TN	AN	TP	AP	TK	AK	salt	Shannon	Simpson	Ace	Chao
pH	Pearson	1	-0.012	-0.428	-.859**	-0.604	-0.63	-0.475	-0.446	-0.602	0.509	0.034	0.596	.672*
	Significance (T)		0.976	0.25	0.003	0.085	0.069	0.197	0.229	0.086	0.162	0.931	0.091	0.048
	N	9	9	9	9	9	9	9	9	9	9	9	9	9
OM	Pearson	-0.012	1	-0.188	-0.067	-0.531	-0.495	0.541	.804**	.670*	0.093	0.256	0.317	0.297
	Significance (T)	0.976		0.629	0.863	0.141	0.176	0.132	0.009	0.048	0.811	0.506	0.406	0.437
	N	9	9	9	9	9	9	9	9	9	9	9	9	9
TN	Pearson	-0.428	-0.188	1	.744*	0.657	.717*	0.261	0.197	0.373	-0.588	-0.485	-0.586	-0.655
	Significance (T)	0.25	0.629		0.021	0.055	0.03	0.497	0.612	0.323	0.096	0.185	0.097	0.055
	N	9	9	9	9	9	9	9	9	9	9	9	9	9
AN	Pearson	-.859**	-0.067	.744*	1	.671*	.768*	0.518	0.463	0.66	-0.652	-0.261	-0.627	-.736*
	Significance (T)	0.003	0.863	0.021		0.048	0.016	0.153	0.209	0.053	0.057	0.498	0.071	0.024
	N	9	9	9	9	9	9	9	9	9	9	9	9	9
TP	Pearson	-0.604	-0.531	0.657	.671*	1	.756*	-0.103	-0.112	0.004	-.670*	-0.047	-.738*	-.742*
	Significance (T)	0.085	0.141	0.055	0.048		0.018	0.792	0.774	0.992	0.048	0.904	0.023	0.022
	N	9	9	9	9	9	9	9	9	9	9	9	9	9
AP	Pearson	-0.63	-0.495	.717*	.768*	.756*	1	-0.042	-0.106	0.144	-.769*	-0.169	-.736*	-.787*
	Significance (T)	0.069	0.176	0.03	0.016	0.018		0.915	0.786	0.711	0.015	0.664	0.024	0.012
	N	9	9	9	9	9	9	9	9	9	9	9	9	9
TK	Pearson	-0.475	0.541	0.261	0.518	-0.103	-0.042	1	.748*	.886**	0.005	-0.221	0.12	-0.034
	Significance (T)	0.197	0.132	0.497	0.153	0.792	0.915		0.021	0.001	0.99	0.567	0.759	0.932
	N	9	9	9	9	9	9	9	9	9	9	9	9	9
AK	Pearson	-0.446	.804**	0.197	0.463	-0.112	-0.106	.748*	1	.899**	-0.103	-0.073	0.039	-0.03
	Significance (T)	0.229	0.009	0.612	0.209	0.774	0.786	0.021		0.001	0.792	0.852	0.921	0.939
	N	9	9	9	9	9	9	9	9	9	9	9	9	9
salt	Pearson	-0.602	.670*	0.373	0.66	0.004	0.144	.886**	.899**	1	-0.305	-0.072	-0.14	-0.262
	Significance (T)	0.086	0.048	0.323	0.053	0.992	0.711	0.001	0.001		0.425	0.854	0.719	0.497
	N	9	9	9	9	9	9	9	9	9	9	9	9	9
Shannon	Pearson	0.509	0.093	-0.588	-0.652	-.670*	-.769*	0.005	-0.103	-0.305	1	-0.35	.717*	.743*
	Significance (T)	0.162	0.811	0.096	0.057	0.048	0.015	0.99	0.792	0.425		0.356	0.03	0.022
	N	9	9	9	9	9	9	9	9	9	9	9	9	9
Simpson	Pearson	0.034	0.256	-0.485	-0.261	-0.047	-0.169	-0.221	-0.073	-0.072	-0.35	1	-0.018	0.039
	Significance (T)	0.931	0.506	0.185	0.498	0.904	0.664	0.567	0.852	0.854	0.356		0.962	0.92
	N	9	9	9	9	9	9	9	9	9	9	9	9	9
Ace	Pearson	0.596	0.317	-0.586	-0.627	-.738*	-.736*	0.12	0.039	-0.14	.717*	-0.018	1	.983**
	Significance (T)	0.091	0.406	0.097	0.071	0.023	0.024	0.759	0.921	0.719	0.03	0.962		0
	N	9	9	9	9	9	9	9	9	9	9	9	9	9
Chao	Pearson	.672*	0.297	-0.655	-.736*	-.742*	-.787*	-0.034	-0.03	-0.262	.743*	0.039	.983**	1
	Significance (T)	0.048	0.437	0.055	0.024	0.022	0.012	0.932	0.939	0.497	0.022	0.92	0
	N	9	9	9	9	9	9	9	9	9	9	9	9	9
T means two-sided test.
**. Significantly correlated at the .01 level (T).
*. Significantly correlated at the 0.05 level (T).
